# Supplementary material for: Phosphorylation dependent mitochondrial translocation of Nr4a3 provokes cardiomyocyte death
Source: Research Square preprint supplement (doi:10.21203/rs.3.rs-384268/v1), 2021-04-13
Supplement: Supplementary file 1 [file 898e848b4720c060bc99769b.pdf]

Supplementary Figure 1

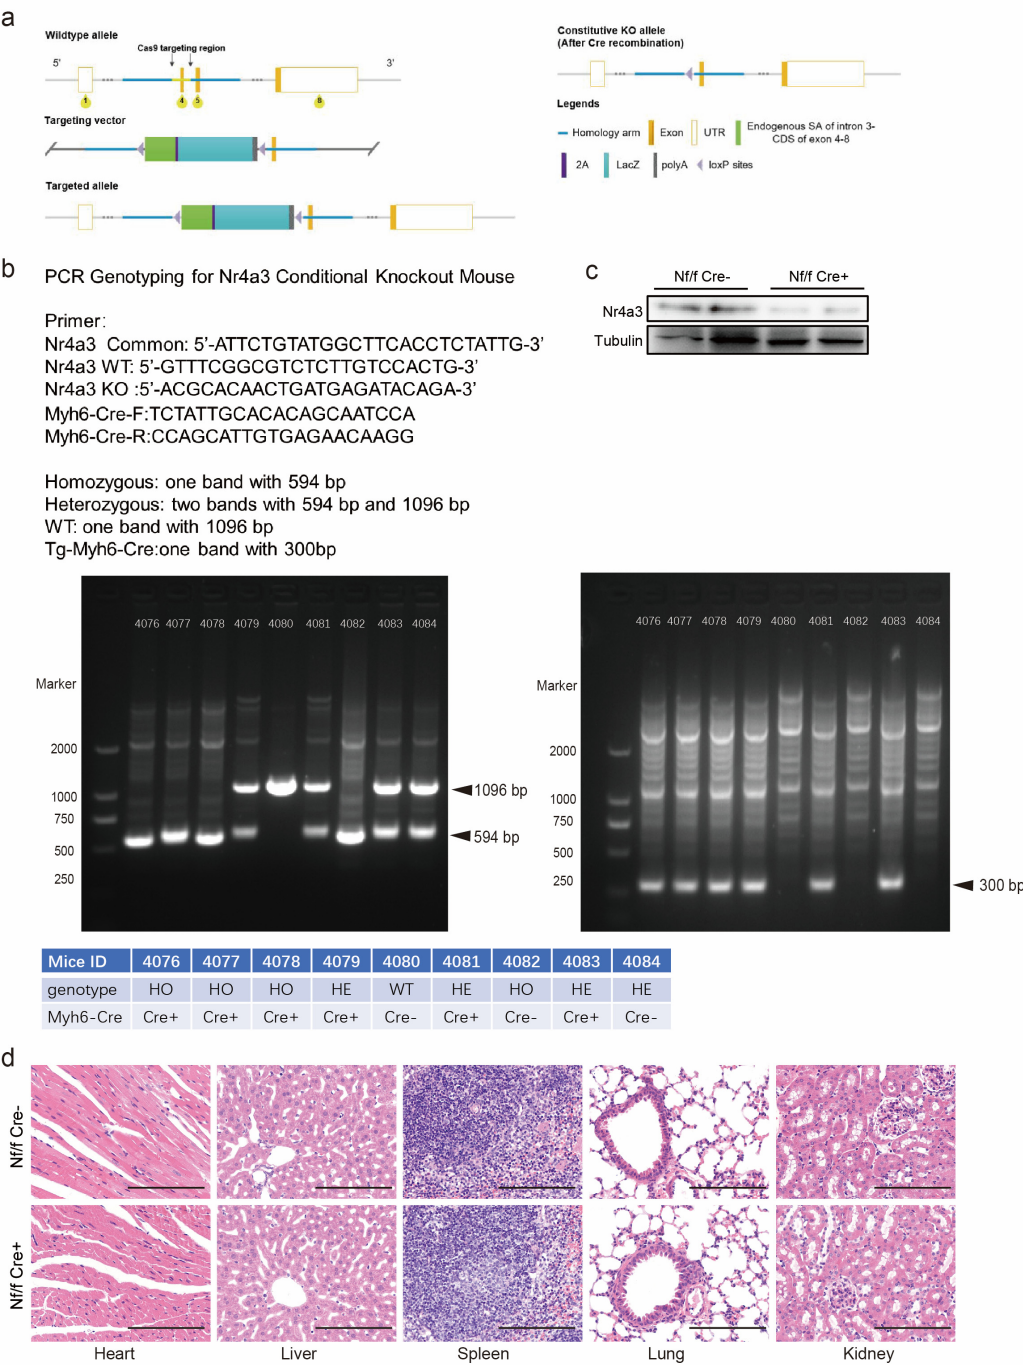

**Supplementary Fig. 1. Generation and characterization of cardiac specific Nr4a3 knockout mice**

**a** The strategies of the Nr4a3<sup>fllox/flox</sup> and tissue specific Nr4a3 knockout mice generation. **b** Nr4a3<sup>fllox/flox</sup> mice were crossed with transgenic mice expressing tamoxifen-inducible Cre recombinase protein fused to a mutant estrogen-receptor ligand binding domain driven by  $\alpha$ -myosin heavy chain promoter (Myh6-CreERT2, abbreviated as Myh6 Cre), resulting in Nf/f Cre<sup>+</sup> (Nr4a3<sup>fllox/flox</sup>-Myh6-CreERT2<sup>+</sup>) and Nf/f Cre<sup>-</sup> mice. Primer sequences and results of the genotyping of tail DNA samples were obtained from the Nf/f Cre<sup>+</sup> and Nf/f Cre<sup>-</sup> animals. **c** The expression of Nr4a3 in

the hearts were examined in Nf/f Cre<sup>+</sup> and Nf/f Cre<sup>-</sup> mice after tamoxifen treatment. **d**  
There were no obvious differences in the histological analysis of heart, liver, spleen,  
lung and kidney tissue between Nf/f Cre<sup>+</sup> and Nf/f Cre<sup>-</sup> mice after tamoxifen  
treatment. Scale bar, 100  $\mu$ m.

## Supplementary Figure 2

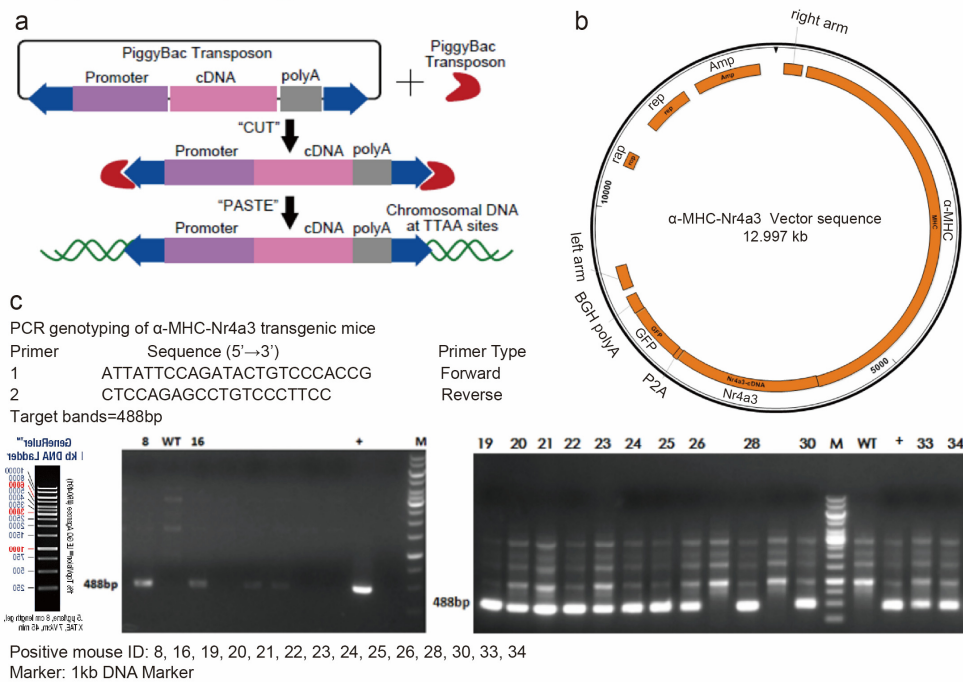

## Supplementary Fig. 2. Generation and genotyping of α-MHC-Nr4a3 transgenic mice

**a** The principle of the PiggyBAC Transposase System. **b** A targeting vector was comprised of right arm, α-MHC promoter, Nr4a3 cDNA, P2A, BGH polyA and left arm sequences. **c** Primer sequences and results of the genotyping wild-type (WT) and α-MHC-Nr4a3 transgenic mice from tail DNA samples.

## Supplementary Figure 3

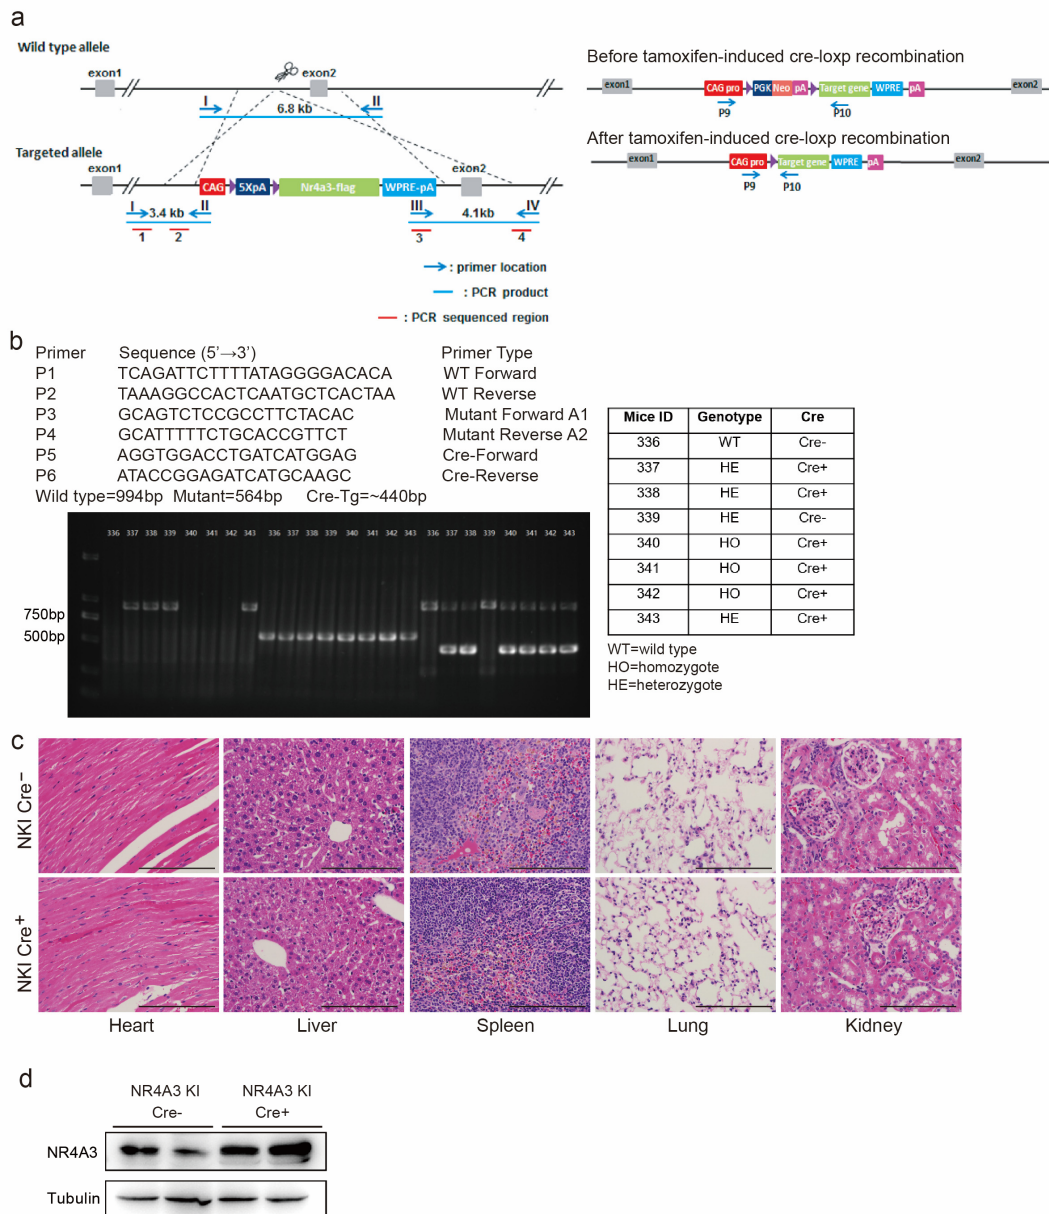

### Supplementary Fig. 3. Generation and characterization of conditional Nr4a3 knock-in mice

**a** This project used CRISPR/Cas9 technology to insert the CAG promoter-loxp-stop-loxp-Nr4a3-flag-WPRE-polyA expression cassette at the *Rosa26* locus by homologous recombination. A targeting vector was constructed by In-Fusion cloning (see Methods). Cas9 mRNA, gRNA and donor vector were microinjected into C57BL/6J mice fertilized eggs to obtain F<sub>0</sub> mice. A purple triangle indicates the inserted loxp sites. The presence of the loxp-stop-loxp expression cassette prevented transcription of the downstream *Nr4a3* target gene. After mating with tissue or cell specific Cre mice, loxp-stop-loxp expression box was knocked out, and high expression of *Nr4a3* was achieved with the CAG promoter. **b** Nr4a3 knock-in



mice (abbreviated as Nr4a3 KI or NKI) were crossed with transgenic mice expressing tamoxifen-inducible Cre recombinase protein fused to a mutant estrogen-receptor ligand binding domain driven by  $\alpha$ -myosin heavy chain promoter (Myh6-CreERT2, abbreviated as Myh6 Cre), resulting in NKI Cre<sup>+</sup> (Nr4a3 KI-Myh6-CreERT2<sup>+</sup>) and NKI Cre<sup>-</sup> (Nr4a3 KI) mice. Primer sequences and results of the genotyping of tail DNA samples were obtained from the NKI Cre<sup>+</sup> and NKI Cre<sup>-</sup> animals. **c** There were no obvious differences in the histological analysis of heart, liver, spleen, lung and kidney tissue between NKI Cre<sup>+</sup> and NKI Cre<sup>-</sup> mice before tamoxifen treatment. Scale bar, 100  $\mu$ m. **d** The expression of Nr4a3 in the hearts was examined in NKI Cre<sup>+</sup> and NKI Cre<sup>-</sup> mice after tamoxifen treatment.

## Supplementary Figure 4

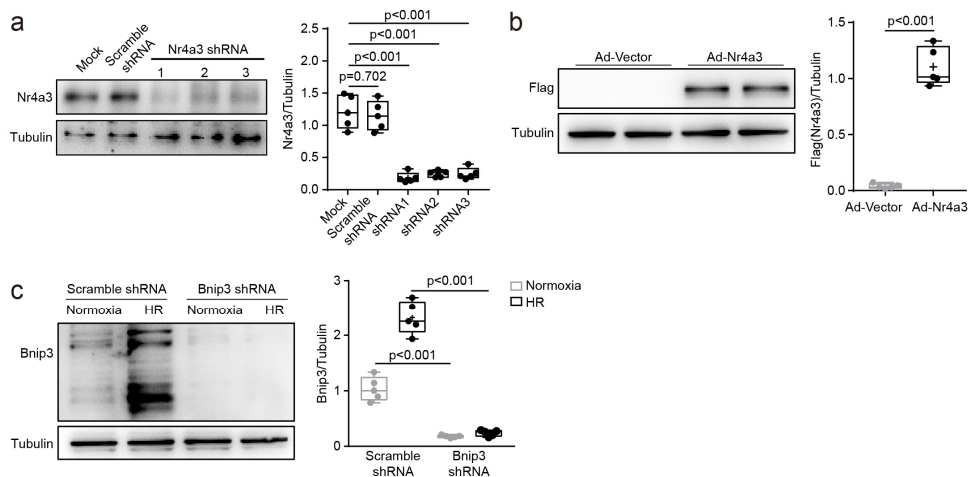

### Supplementary Fig. 4. Confirm the efficiency of lentivirus-mediated Nr4a3 or Bnip3 knockdown and adenovirus-mediated Nr4a3 overexpression

**a** Lentivirus-mediated shRNA to Nr4a3 was transduced into NRVMs, and the expression of Nr4a3 was examined 24 hours after transfection. **b** NRVMs were transfected with adenovirus-Nr4a3 or its control vector, the expression level of Nr4a3 was examined by western blot 24 hour after transfection. **c** Lentivirus-mediated shRNA to Bnip3 was transduced into NRVMs, which were cultured under normoxic or hypoxia reoxygenation (24 hours hypoxia and 6 hours reoxygenation (HR)) conditions, and then immunoblotted with Bnip3 antibody.

## Supplementary Figure 5

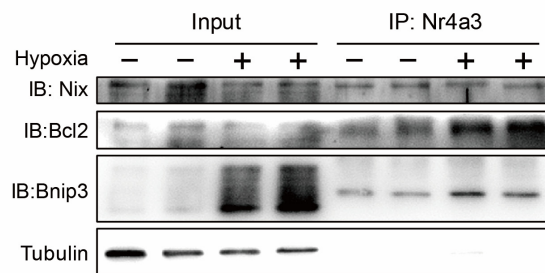

### Supplementary Fig. 5. Nr4a3 interacts with the Bcl2 family proteins

NRVMs were cultured for 24 hours of hypoxia followed by 6 hours of reoxygenation (HR), and then analyzed by immunoprecipitation using an anti-Nr4a3 antibody followed by western blot using antibodies against Nix, Bnip3 and Bcl2, the experiments were repeated for 3 times. NRVMs, neonatal rat ventricular myocytes.

## Supplementary Figure 6

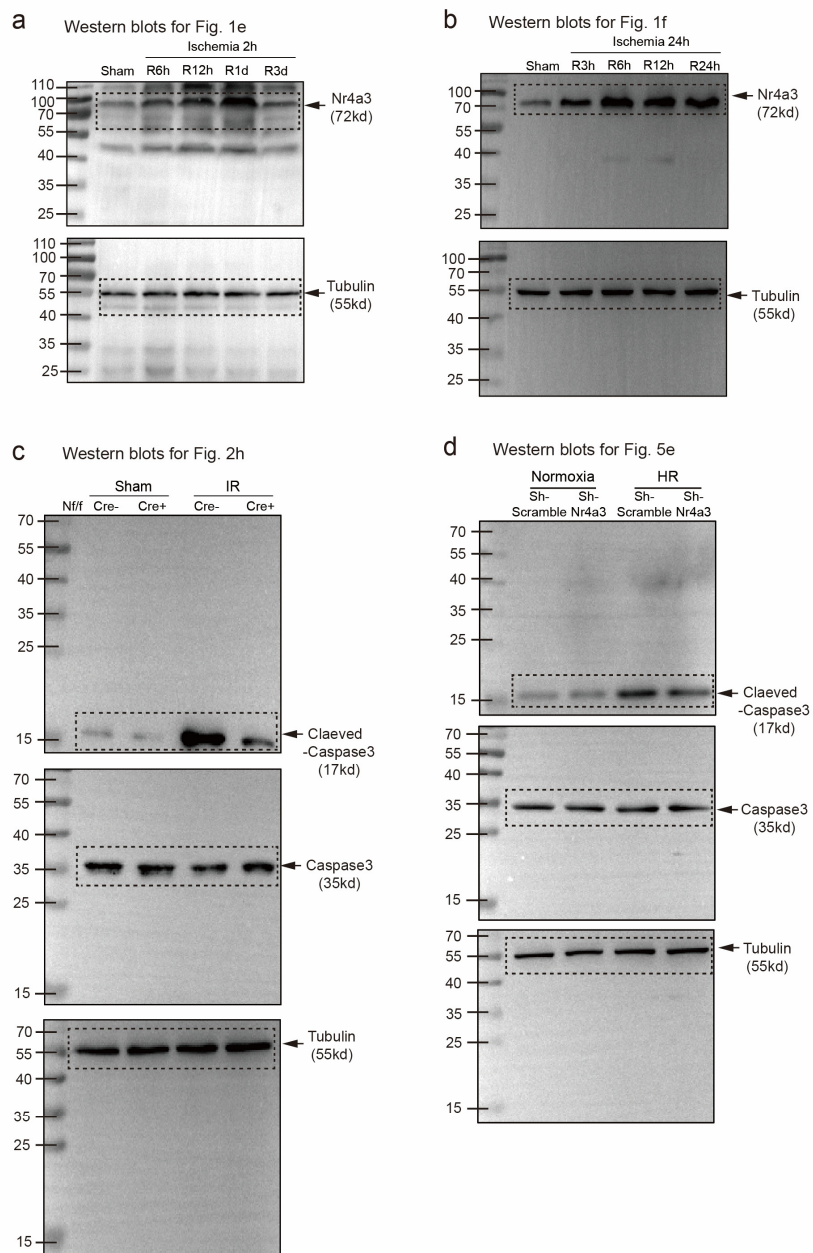

## Supplementary Figure 7

**a** Western blots for Fig. 6c

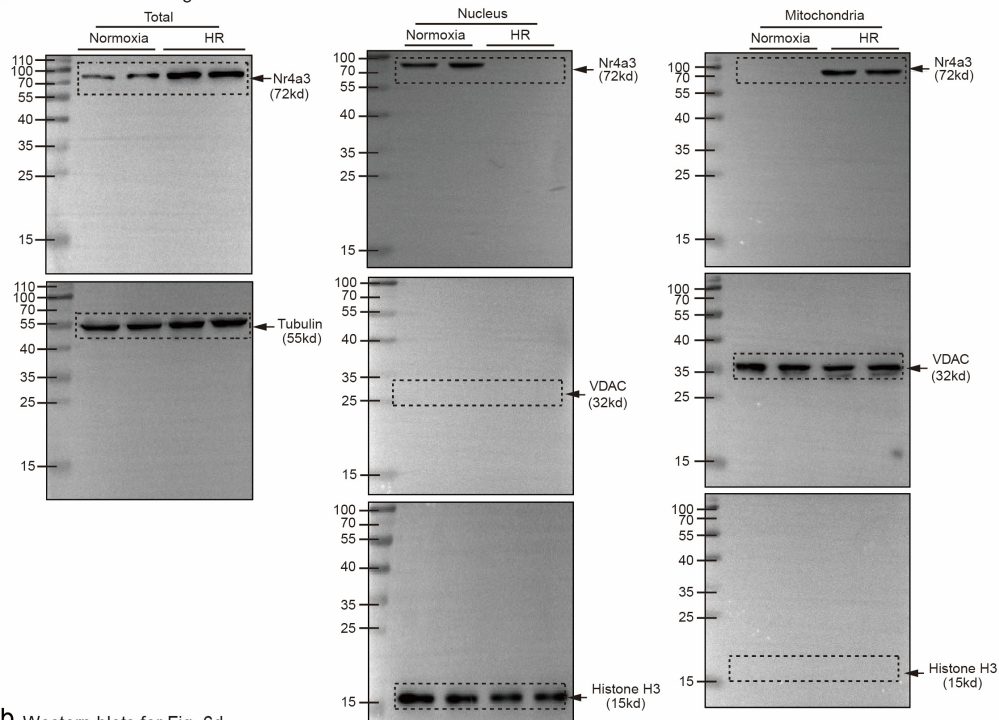

**b** Western blots for Fig. 6d

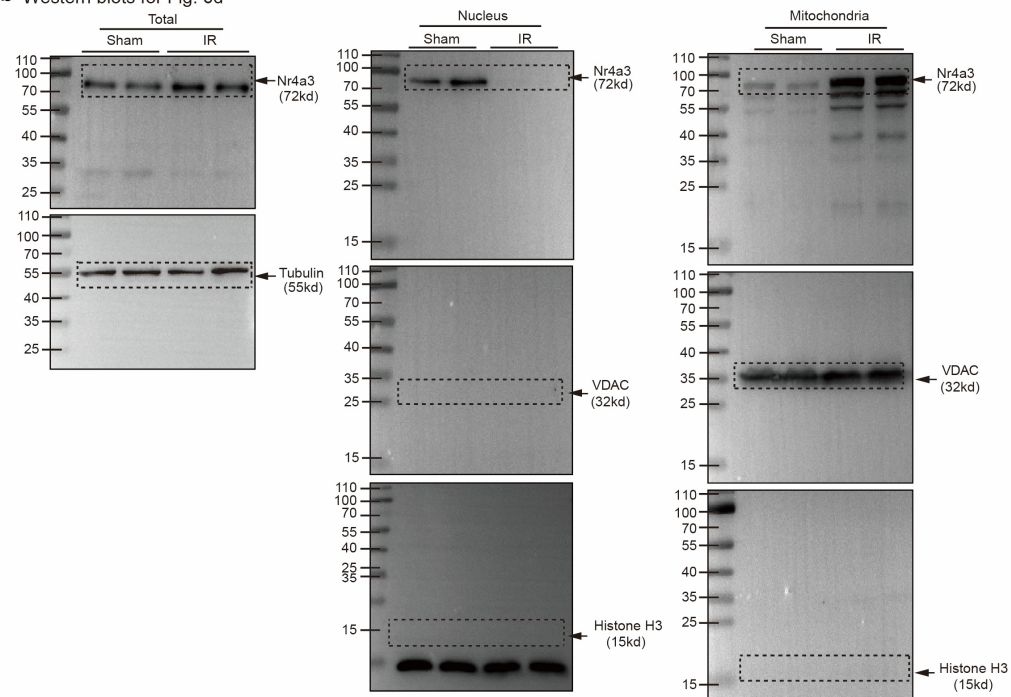



Supplementary Figure 8

a Western blots for Fig. 6e

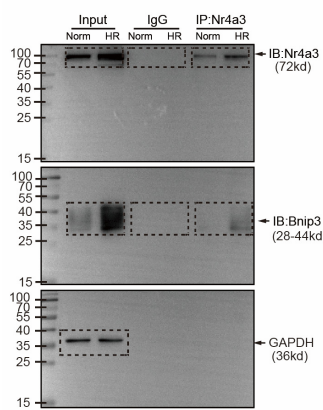

b Western blots for Fig. 6h

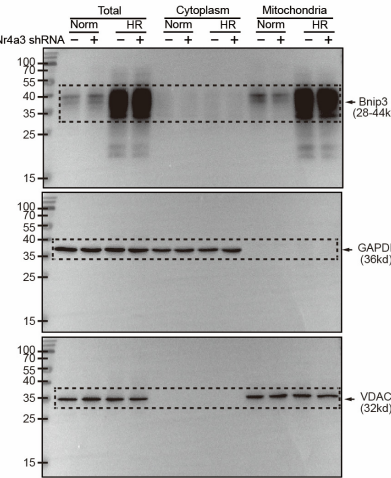

c Western blots for Fig. 6i

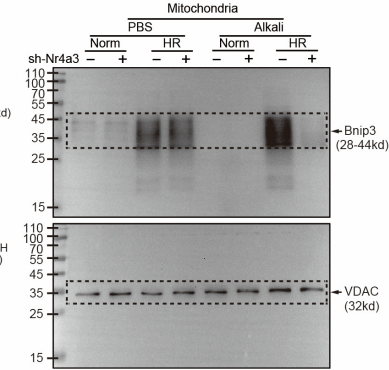

d Western blots for Fig. 7b

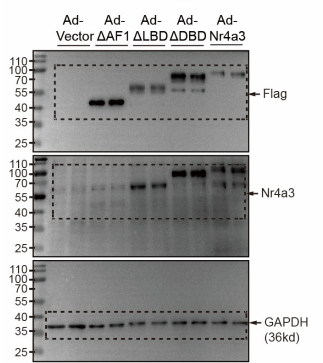

e Western blots for Fig. 7d

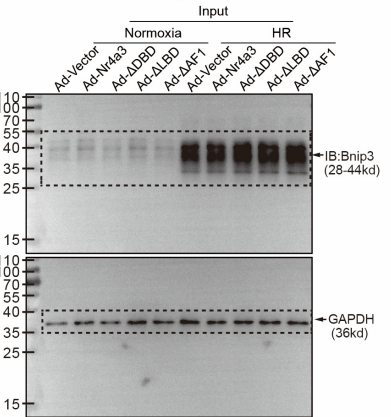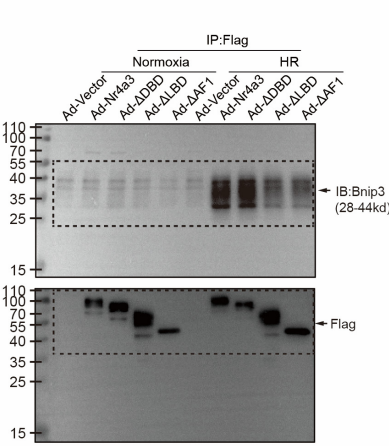

f Western blots for Fig. 7e

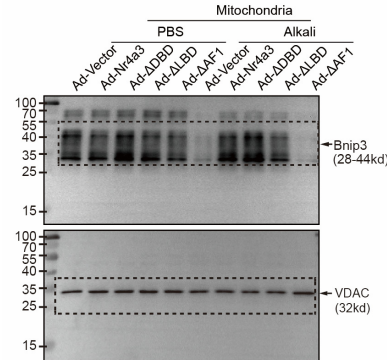

## Supplementary Figure 9

**a** Western blots for Fig. 8b

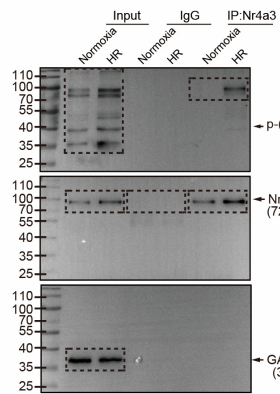

**b** Western blots for Fig. 8d

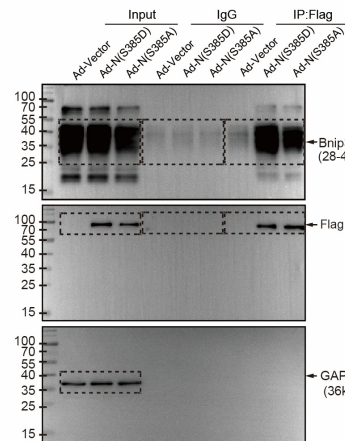

**c** Western blots for Fig. 8e

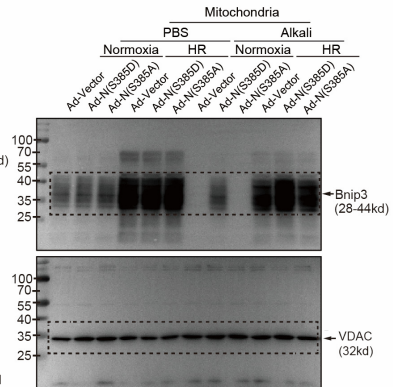

**d** Western blots for Supplementary Fig. 1c

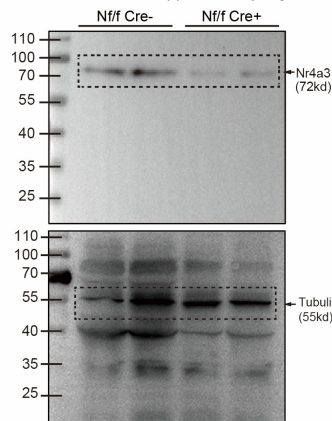

**e** Western blots for Supplementary Fig. 3d

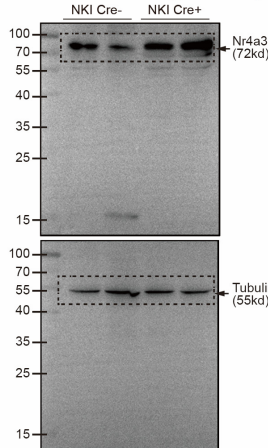

**f** Western blots for Supplementary Fig. 4a

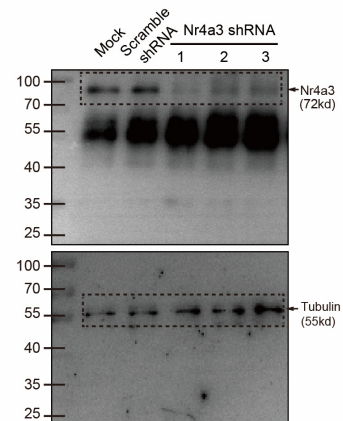

**g** Western blots for Supplementary Fig. 4b

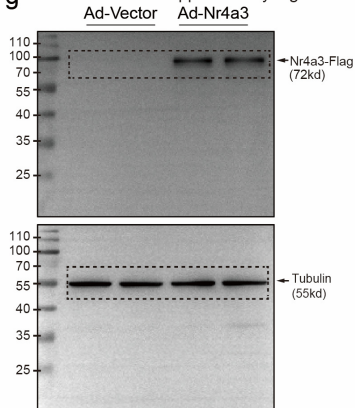

**h** Western blots for Supplementary Fig. 4c

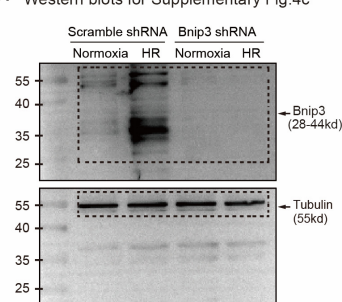

# Supplementary Figure 10

Western blots for Supplementary Fig. 5

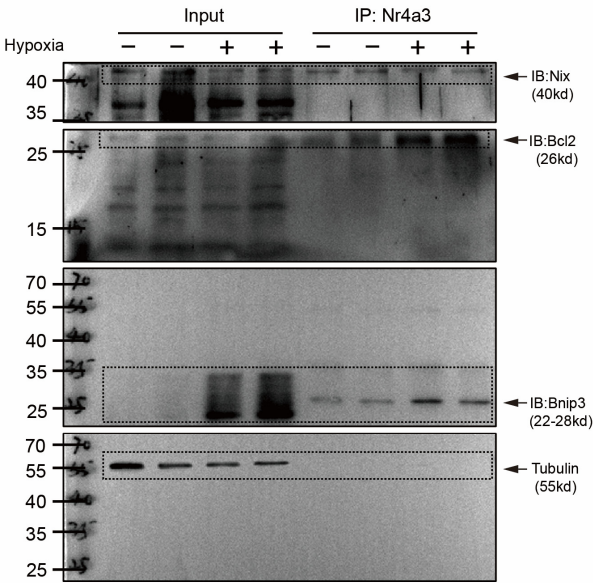

Supplementary Fig. 6-10. Uncropped gel scans for all presented western blots

**Supplementary Table1. List of antibodies and kits used in this study**

| <b>Antibody specificity</b>                   | <b>Company</b> | <b>Cat. No.</b> | <b>Application</b> | <b>Dilution</b> |
|-----------------------------------------------|----------------|-----------------|--------------------|-----------------|
| Nr4a3                                         | R&D            | #H7833          | WB                 | 1:1000          |
| GAPDH                                         | Proteintech    | 60004-1-1g      | WB                 | 1:3000          |
| Tubulin                                       | Sigma          | T9026           | WB                 | 1:3000          |
| Histone H3                                    | CST            | #4499           | WB                 | 1:1000          |
| Caspase-3                                     | CST            | #9662           | WB                 | 1:1000          |
| Cleaved Caspase-3                             | CST            | #9661           | WB                 | 1:1000          |
| DYKDDDDK Tag                                  | CST            | #14793          | WB                 | 1:1000          |
| BNIP3                                         | CST            | #3769           | WB                 | 1:1000          |
| Nix                                           | CST            | #12396          | WB                 | 1:1000          |
| BCI-2                                         | CST            | #15071          | WB                 | 1:1000          |
| VDAC                                          | CST            | #4866           | WB                 | 1:1000          |
| Anti-DDK                                      | OriGene        | TA100011        | IP                 |                 |
| Nr4a3                                         | R&D            | #H7833          | IP                 |                 |
| Nr4a3                                         | Abcam          | ab94507         | IB                 | 1:1000          |
| Caveolin 3                                    | Abcam          | ab2912          | IF                 | 1:100           |
| Nr4a3                                         | R&D            | #H7833          | IF                 | 1:100           |
| Bnip3                                         | Abcam          | ab109362        | IF                 | 1:100           |
| Hsp60                                         | OriGene        | AP22882PU-N     | IF                 | 1:100           |
| $\alpha$ -actinin                             | Sigma          | A7811           | IF                 | 1:500           |
| TMRM                                          | Invitrogen     | T668            | IF                 | 1:2000          |
| Calcein, AM                                   | Invitrogen     | C3099           | IF                 | 1:1000          |
| Mitotracker Red                               | Invitrogen     | M7512           | IF                 | 1:1000          |
| Mitotracker Green                             | Invitrogen     | M7514           | IF                 | 1:1000          |
| In Situ Cell Death Detection Kit, Fluorescein | Roche          | 11684795910     | IF                 |                 |
| Live/Dead Cell Double Staining Kit            | Merck          | 04511-1KT-F     | IF                 |                 |
| CD45-BV421                                    | Biolegend      | 103134          | FACS               | 1:300           |
| CD31-PE                                       | Biolegend      | 102419          | FACS               | 1:300           |
| gp38-APC                                      | Biolegend      | 127410          | FACS               | 1:300           |
| Zombie Aqua™ Fixable Viability Kit            | Biolegend      | 423101          | FACS               | 1:100           |
| Lentiviral Packaging Kits                     | Origene        | TR30037         |                    |                 |
| Phospho-(Ser/Thr) Akt Substrate Antibody      | CST            | #9611           | WB                 | 1:1000          |
